# Supplementary material for: Mechanochemically induced transformation of CoO(OH) into Co3O4 nanoparticles and their highly reversible Li storage characteristics
Source: Royal Society of Chemistry journal article supplement (doi:10.1039/c6ra26099c), 2017-01-01
Supplement: c6ra26099c1.pdf [file c6ra26099c1.pdf]

Supplementary Information:

# Mechanochemically induced transformation of CoO(OH) into Co<sub>3</sub>O<sub>4</sub> nanoparticles and their highly reversible Li storage characteristics

*Jae-Wan Park and Cheol-Min Park\**

School of Materials Science and Engineering, Kumoh National Institute of Technology,  
Gumi, Gyeongbuk 39177, Republic of Korea

---

\*Cheol-Min Park. Tel.: +82-54-478-7746; Fax: +82-54-478-7769

*E-mail:* [cmpark@kumoh.ac.kr](mailto:cmpark@kumoh.ac.kr)

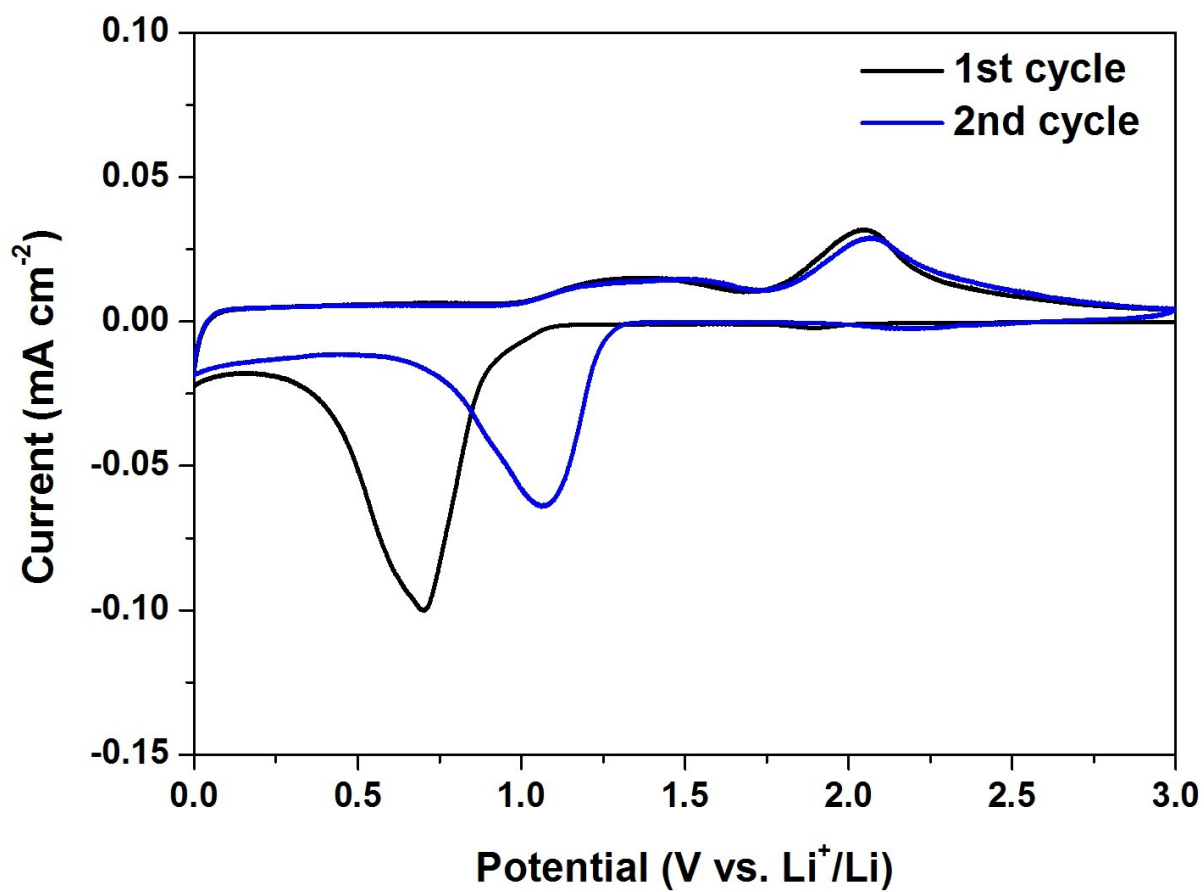

**Supporting Figure S1.** CV results for the first and second cycles of the synthesized  $\text{Co}_3\text{O}_4$  nanoparticles electrode.

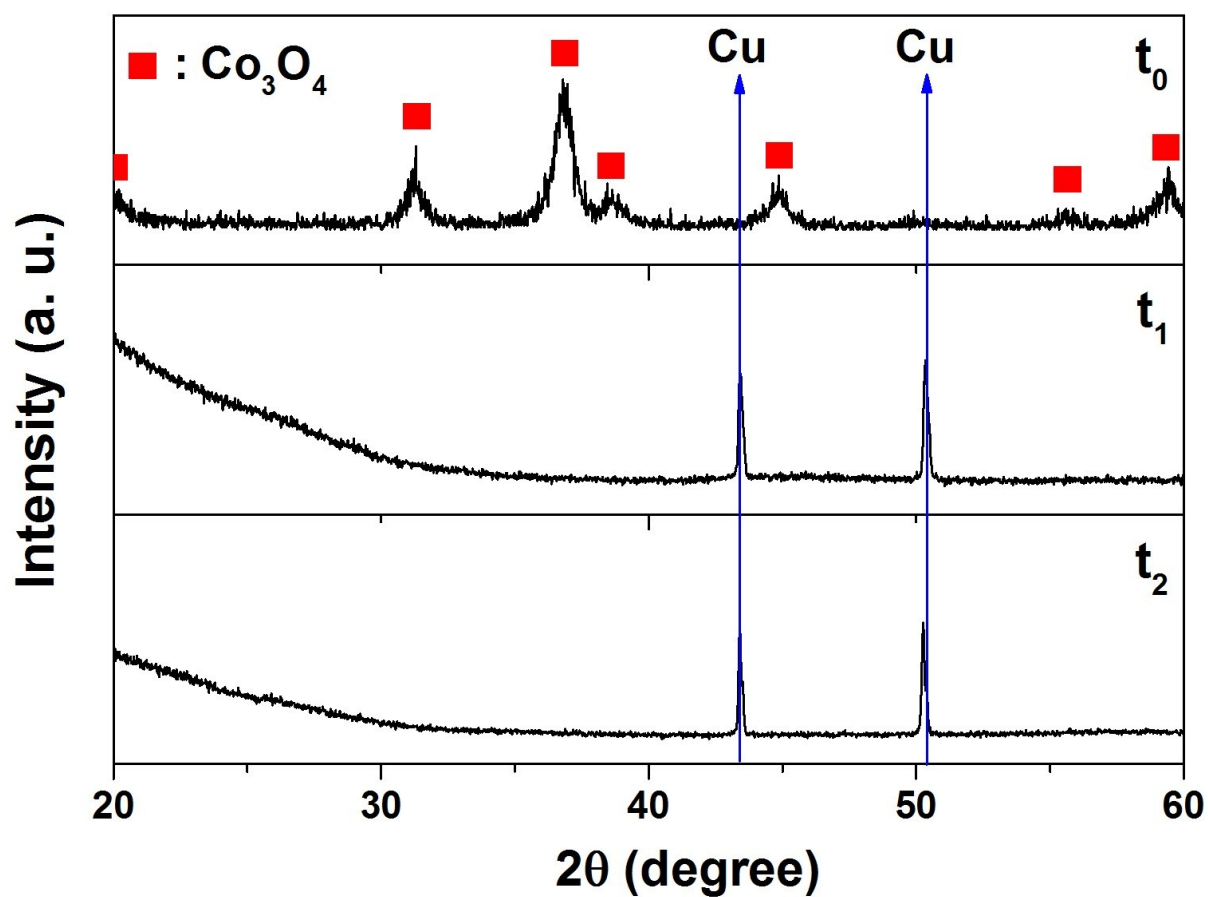

**Supporting Figure S2.** Ex situ XRD results for the  $\text{Co}_3\text{O}_4$  nanoparticles electrode at the selected potentials indicated in Figure 4a during the first cycle.

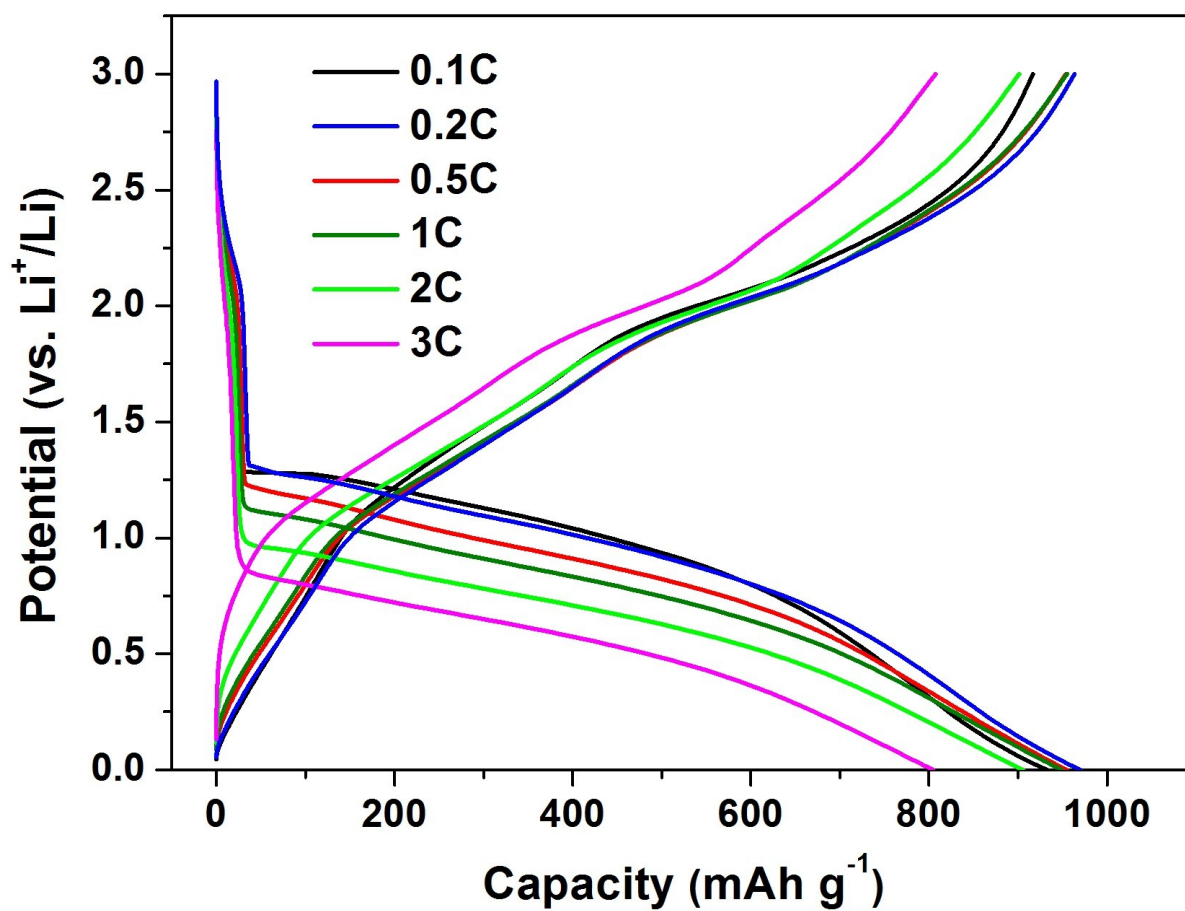

**Supporting Figure S3.** Voltage profiles of Co<sub>3</sub>O<sub>4</sub> nanoparticles electrode at various current rate (0.1C, 0.2C, 0.5C, 1C, 2C, 3C, and C is defined as full use of the limited charging capacity, 900 mA h g<sup>-1</sup>, in 1 h).
